# Supplementary material for: Saturated Fatty Acids and Cardiovascular Disease: Replacements for Saturated Fat to Reduce Cardiovascular Risk
Source: Preprints.org preprint supplement (doi:10.20944/preprints201705.0135.v1), 2017-05-18
Supplement: Supplementary file 1 [file Table%201%20final%20pdf.pdf]

**Table 1: The effect of replacing SFA with other dietary macronutrients on cardiovascular outcomes**

| Study                                         | Design                                        | n                      | Mean follow-up time (years) | Outcome                                | Substitution                                                     | Result     | Effect size (95% CI)                           | Covariates included in analyses                                                                                                                                                                                                                                                                                                                     |
|-----------------------------------------------|-----------------------------------------------|------------------------|-----------------------------|----------------------------------------|------------------------------------------------------------------|------------|------------------------------------------------|-----------------------------------------------------------------------------------------------------------------------------------------------------------------------------------------------------------------------------------------------------------------------------------------------------------------------------------------------------|
| <b>Substitution of saturated fat for MUFA</b> |                                               |                        |                             |                                        |                                                                  |            |                                                |                                                                                                                                                                                                                                                                                                                                                     |
| Jakobsen 2009 [1]                             | Pooled analysis of prospective cohort studies | 11 studies (n=344,696) | Range 4 to 10               | Coronary events<br><br>Coronary deaths | 5% of energy from SFA → MUFA<br><br>5% of energy from SFA → MUFA | ↔<br><br>↔ | HR 1.19 (1.00-1.42)<br><br>HR 1.01 (0.73-1.41) | Age; BMI; year survey completed; percentage of energy from MUFA, PUFA, trans fat, protein and carbohydrates; energy intake; smoking; physical activity; education; alcohol intake; fiber intake; cholesterol intake; hypertension                                                                                                                   |
| Guasch-Ferré 2015 [2]<br>[PREDIMED]           | Prospective cohort                            | 7,038                  | 6                           | CVD<br><br>All-cause death             | 5% of energy from SFA → MUFA                                     | ↓<br><br>↔ | HR 0.63 (0.43-0.94)<br><br>HR 0.91 (0.65-1.26) | Age; sex; BMI; intake of subtypes of fat, protein, and carbohydrates; energy intake; smoking; physical activity; education; alcohol intake; fiber intake; cholesterol intake; hypertension; intervention group; diabetes; hyper-cholesterolemia; family history of CHD; antihypertensive medication; oral antidiabetic agents; lipid lowering drugs |
| Li 2015 [3]<br>[NHS; HPFS]                    | Prospective cohort                            | 127,536                | Range 24-30                 | CHD                                    | 5% of energy from SFA → MUFA                                     | ↓          | HR 0.85 (0.74-0.97)                            | BMI, percentage of energy from protein; energy intake; smoking; physical activity; alcohol intake; cholesterol intake; hypertension at                                                                                                                                                                                                              |

|                                         |                    |         |                        |                                      |                                        |            |                                                |                                                                                                                                                                                                                                                                                                                                                                                                                                                                                                                           |
|-----------------------------------------|--------------------|---------|------------------------|--------------------------------------|----------------------------------------|------------|------------------------------------------------|---------------------------------------------------------------------------------------------------------------------------------------------------------------------------------------------------------------------------------------------------------------------------------------------------------------------------------------------------------------------------------------------------------------------------------------------------------------------------------------------------------------------------|
|                                         |                    |         |                        |                                      |                                        |            |                                                | baseline; hypercholesterolemia at baseline; family history of myocardial infarction and diabetes; use of vitamins and aspirin                                                                                                                                                                                                                                                                                                                                                                                             |
| Praagman 2016 [4]<br>[EPIC-Netherlands] | Prospective cohort | 35,597  | 12                     | IHD                                  | 5% of energy from SFA → cis-MUFA       | ↑          | HR 1.30 (1.02-1.65)                            | Age, sex, BMI, waist circumference; intake of carbohydrate, cis-MUFA, PUFA, trans fat, animal protein and vegetable (per 5% of energy); energy intake (excluding alcohol); smoking, physical activity; education; alcohol intake; fiber intake (energy adjusted); cholesterol intake (energy adjusted); vitamin c (energy adjusted)                                                                                                                                                                                       |
| Wang 2016 [5]<br>[NHS; HPFS]            | Prospective cohort | 126,233 | NHS ≤ 32;<br>HPFS ≤ 26 | CVD mortality<br><br>Total mortality | 5% of energy from SFA → MUFA           | ↔<br><br>↓ | HR 0.96 (0.84-1.09)<br><br>HR 0.87 (0.82-0.93) | Age; BMI, percentage of energy intake from protein, remaining fatty acids (saturated fat, PUFA, MUFA, trans-fat, ω-6 PUFAs, ω-3 PUFAs, linoleic acid, arachidonic acid, α-linolenic acid, and marine ω-3 fats); energy intake; smoking; physical activity; alcohol intake; cholesterol intake; family history of myocardial infarction, diabetes, cancer, hypertension, hypercholesterolemia; multivitamin use; vitamin E supplement; aspirin use; white race; marital status; menopausal status and hormone use in women |
| Zong 2016 [6]<br>[NHS; HPFS]            | Prospective cohort | 115,782 | NHS 25.8;<br>HPFS 21.2 | CHD                                  | 1% of energy from 12:0-18:0 SFA → MUFA | ↔          | HR 0.95 (0.90, 1.01)                           | Age; BMI; ethnicity; total energy; energy from trans fat; energy from carbohydrates of non-whole grain sources; energy from non-plant sources; smoking status; physical                                                                                                                                                                                                                                                                                                                                                   |

|                                               |                                               |                        |                           |                 |                                       |   |                     |                                                                                                                                                                                                                                                                  |
|-----------------------------------------------|-----------------------------------------------|------------------------|---------------------------|-----------------|---------------------------------------|---|---------------------|------------------------------------------------------------------------------------------------------------------------------------------------------------------------------------------------------------------------------------------------------------------|
|                                               |                                               |                        |                           |                 |                                       |   |                     | activity; alcohol intake; family history of MI; menopausal status; postmenopausal hormone use; aspirin use; multivitamin use; baseline hypertension; baseline hypercholesterolemia; PUFA intake; whole grains intake; plant proteins intake; intake of other SFA |
| Hooper 2015 [7]<br><br>Cochrane review        | Meta-analysis of randomized controlled trials | 15 studies (n >59,000) | >2                        | CVD events      | SFA → MUFA                            | ↔ | RR 1.00 (0.53-1.89) | Aggregate meta-analysis –no overall adjustment                                                                                                                                                                                                                   |
| <b>Substitution of saturated fat for PUFA</b> |                                               |                        |                           |                 |                                       |   |                     |                                                                                                                                                                                                                                                                  |
| Mozaffarian 2010 [8]                          | Meta-analysis of randomized controlled trials | 8 studies (n= 13,614)  | Median of all trials 4.25 | CHD             | 5% of energy from SFA → total PUFA    | ↓ | RR 0.90 (0.83-0.97) | Aggregate meta-analysis –no overall adjustment                                                                                                                                                                                                                   |
| Jakobsen 2009 [1]                             | Pooled analysis of prospective cohort studies | 11 studies (n=344,696) | Range 4 to 10             | Coronary events | 5% of energy from SFA → total PUFA    | ↓ | HR 0.87 (0.77-0.97) | Age; BMI; year survey completed; percentage of energy from MUFA, PUFA, trans fat, protein and carbohydrates; energy intake; smoking; physical activity; education; alcohol intake; fiber intake; cholesterol intake; hypertension                                |
|                                               |                                               |                        |                           | Coronary deaths | 5% of energy from SFA → total PUFA    | ↓ | HR 0.74 (0.61-0.89) |                                                                                                                                                                                                                                                                  |
| Farvid 2014 [9]                               | Meta-analysis of prospective                  | 13 studies (n=310,602) | Range 5.3 to 30           | Coronary events | 5% of energy from SFA → linoleic acid | ↓ | RR 0.91 (0.87-0.96) | Aggregate meta-analysis – analyses in the individuals studies adjusted but no overall adjustment                                                                                                                                                                 |

|                                       |                    |         |                                     |                                |                                          |                     |                                                                            |                                                                                                                                                                                                                                                                                                                                                     |
|---------------------------------------|--------------------|---------|-------------------------------------|--------------------------------|------------------------------------------|---------------------|----------------------------------------------------------------------------|-----------------------------------------------------------------------------------------------------------------------------------------------------------------------------------------------------------------------------------------------------------------------------------------------------------------------------------------------------|
|                                       | cohort studies     |         |                                     | Coronary deaths                |                                          | ↓                   | RR 0.87<br>(0.82-0.94)                                                     |                                                                                                                                                                                                                                                                                                                                                     |
| Li 2015 [3]<br>[NHS; HPFS]            | Prospective cohort | 127,536 | Range 24-30                         | CHD                            | 5% of energy from SFA → total PUFA       | ↓                   | HR 0.75<br>(0.67-0.84)                                                     | BMI, percentage of energy from protein; energy intake; smoking; physical activity; alcohol intake; cholesterol intake; hypertension at baseline; hypercholesterolemia at baseline; family history of myocardial infarction and diabetes; use of vitamins and aspirin                                                                                |
| Guasch-Ferré 2015 [2]<br>[PREDIMED]   | Prospective cohort | 7,038   | 6                                   | CVD<br><br>All-cause mortality | 5% of energy from SFA → PUFA             | ↓<br><br>↓          | HR 0.67<br>(0.45-0.98)<br><br>HR 0.61<br>(0.39-0.97)                       | Age; sex; BMI; intake of subtypes of fat, protein, and carbohydrates; energy intake; smoking; physical activity; education; alcohol intake; fiber intake; cholesterol intake; hypertension; intervention group; diabetes; hyper-cholesterolemia; family history of CHD; antihypertensive medication; oral antidiabetic agents; lipid lowering drugs |
| Chen 2016 [10]<br>[NHS; NHS II; HPFS] | Prospective cohort | 134,327 | NHS ≤ 32;<br>NHS II ≤;<br>HPFS ≤ 24 | CVD<br><br>CHD<br><br>Stroke   | 5% of energy from dairy fat → total PUFA | ↓<br><br>↓<br><br>↓ | HR 0.76<br>(0.71-0.81)<br>HR 0.74<br>(0.68-0.81)<br>HR 0.78<br>(0.70-0.88) | Age, BMI, intake of protein; energy intake; smoking; physical activity; intake of fruit, vegetables, coffee; alcohol intake; baseline hypertension; baseline hyper-cholesterolemia; race; menopausal status and menopausal hormone use (NHS and NHS II); oral contraceptive use (NHS II only)                                                       |

|                                                    |                       |        |    |        |                                                        |   |                            |                                                                                                                                                                                                                                          |
|----------------------------------------------------|-----------------------|--------|----|--------|--------------------------------------------------------|---|----------------------------|------------------------------------------------------------------------------------------------------------------------------------------------------------------------------------------------------------------------------------------|
|                                                    |                       |        |    | CVD    | 5% of energy<br>from dairy fat →<br><i>n</i> -6 PUFA   | ↓ | HR 0.75<br>(0.70-<br>0.81) |                                                                                                                                                                                                                                          |
|                                                    |                       |        |    | CHD    |                                                        | ↓ | HR 0.75<br>(0.69-<br>0.82) |                                                                                                                                                                                                                                          |
|                                                    |                       |        |    | Stroke |                                                        | ↓ | HR 0.76<br>(0.68-<br>0.86) |                                                                                                                                                                                                                                          |
|                                                    |                       |        |    | CVD    | 0.3% of energy<br>from dairy fat →<br>α-linolenic acid | ↓ | HR 0.86<br>(0.82-<br>0.90) |                                                                                                                                                                                                                                          |
|                                                    |                       |        |    | CHD    |                                                        | ↓ | HR 0.83<br>(0.78-<br>0.88) |                                                                                                                                                                                                                                          |
|                                                    |                       |        |    | Stroke |                                                        | ↓ | HR 0.89<br>(0.83-<br>0.96) |                                                                                                                                                                                                                                          |
|                                                    |                       |        |    | CVD    | 0.3% of energy<br>from dairy fat →<br>marine n-3       | ↓ | HR 0.89<br>(0.84-<br>0.94) |                                                                                                                                                                                                                                          |
|                                                    |                       |        |    | CHD    |                                                        | ↓ | HR 0.87<br>(0.81-<br>0.93) |                                                                                                                                                                                                                                          |
|                                                    |                       |        |    | Stroke |                                                        | ↔ | HR 0.92<br>(0.84-<br>1.01) |                                                                                                                                                                                                                                          |
| Praagman<br>2016 [4]<br><br>[EPIC-<br>Netherlands] | Prospective<br>cohort | 35,597 | 12 | IHD    | 5% of energy<br>from SFA →<br>PUFA                     | ↑ | HR 1.35<br>(1.14-<br>1.61) | Age, sex, BMI, waist circumference;<br>intake of carbohydrate, cis-MUFA,<br>PUFA, trans fat, animal protein and<br>vegetable (per 5% of energy); energy<br>intake (excluding alcohol); smoking,<br>physical activity; education; alcohol |

|                                 |                       |         |                           |                    |                                                  |   |                            |                                                                                                                                                                                                                                                                                                                                                                                                                                                                                                                                                                       |
|---------------------------------|-----------------------|---------|---------------------------|--------------------|--------------------------------------------------|---|----------------------------|-----------------------------------------------------------------------------------------------------------------------------------------------------------------------------------------------------------------------------------------------------------------------------------------------------------------------------------------------------------------------------------------------------------------------------------------------------------------------------------------------------------------------------------------------------------------------|
|                                 |                       |         |                           |                    |                                                  |   |                            | intake; fiber intake (energy adjusted);<br>cholesterol intake (energy adjusted);<br>vitamin c (energy adjusted)                                                                                                                                                                                                                                                                                                                                                                                                                                                       |
| Wang 2016<br>[5]<br>[NHS; HPFS] | Prospective<br>cohort | 126,233 | NHS ≤ 32;<br>HPFS ≤ 26    | CVD<br>mortality   | 5% of energy<br>from SFA → total<br>PUFA         | ↓ | HR 0.72<br>(0.65-<br>0.80) | Age; BMI, percentage of energy intake<br>from protein, remaining fatty acids<br>(saturated fat, PUFA, MUFA, trans-fat,<br>ω-6 PUFAs, ω-3 PUFAs, linoleic acid,<br>arachidonic acid, α-linolenic acid, and<br>marine ω-3 fats); energy intake;<br>smoking; physical activity; alcohol<br>intake; cholesterol intake; family<br>history of myocardial infarction,<br>diabetes, cancer, hypertension, hyper-<br>cholesterolemia; multivitamin use;<br>vitamin E supplement; aspirin use;<br>white race; marital status;<br>menopausal status and hormone use<br>in women |
|                                 |                       |         |                           | Total<br>mortality |                                                  | ↓ | HR 0.73<br>(0.70-<br>0.77) |                                                                                                                                                                                                                                                                                                                                                                                                                                                                                                                                                                       |
|                                 |                       |         |                           | CVD<br>mortality   | 2% of energy<br>from SFA → <i>n</i> -6<br>PUFA   | ↓ | HR 0.89<br>(0.85-<br>0.94) |                                                                                                                                                                                                                                                                                                                                                                                                                                                                                                                                                                       |
|                                 |                       |         |                           | Total<br>mortality |                                                  | ↓ | HR 0.93<br>(0.91-<br>0.96) |                                                                                                                                                                                                                                                                                                                                                                                                                                                                                                                                                                       |
|                                 |                       |         |                           | CVD<br>mortality   | 0.3% of energy<br>from SFA → <i>n</i> -3<br>PUFA | ↔ | HR 1.01<br>(0.97-<br>1.05) |                                                                                                                                                                                                                                                                                                                                                                                                                                                                                                                                                                       |
|                                 |                       |         |                           | Total<br>mortality |                                                  | ↓ | HR 0.95<br>(0.93-<br>0.96) |                                                                                                                                                                                                                                                                                                                                                                                                                                                                                                                                                                       |
| Zong 2016<br>[6]<br>[NHS; HPFS] | Prospective<br>cohort | 115,782 | NHS 25.8;<br>HPFS<br>21.2 | CHD                | 1% of energy<br>from 12:0-18:0<br>SFA → PUFA     | ↓ | HR 0.92<br>(0.89,<br>0.96) | Age; BMI; ethnicity; total energy;<br>energy from trans fat; energy from<br>carbohydrates of non-whole grain<br>sources; energy from non-plant<br>sources; smoking status; physical<br>activity; alcohol intake; family history<br>of MI; menopausal status;<br>postmenopausal hormone use; aspirin<br>use; multivitamin use; baseline<br>hypertension; baseline<br>hypercholesterolemia; MUFA intake;                                                                                                                                                                |

|                                                       |                                               |                        |               |                                        |                                                                                              |            |                                                |                                                                                                                                                                                                                                   |
|-------------------------------------------------------|-----------------------------------------------|------------------------|---------------|----------------------------------------|----------------------------------------------------------------------------------------------|------------|------------------------------------------------|-----------------------------------------------------------------------------------------------------------------------------------------------------------------------------------------------------------------------------------|
|                                                       |                                               |                        |               |                                        |                                                                                              |            |                                                | whole grain intake; plant protein intake; intake of other SFA                                                                                                                                                                     |
| Hooper 2015 [7]<br><br>Cochrane review                | Meta-analysis of randomized controlled trials | 15 studies (n >59,000) | >2            | CVD events                             | SFA → PUFA                                                                                   | ↓          | RR 0.73 (0.58-0.92)                            | Aggregate meta-analysis –no overall adjustment                                                                                                                                                                                    |
| <b>Substitution of saturated fat for carbohydrate</b> |                                               |                        |               |                                        |                                                                                              |            |                                                |                                                                                                                                                                                                                                   |
| Jakobsen 2009 [1]                                     | Pooled analysis of prospective cohort studies | 11 studies (n=344,696) | Range 4 to 10 | Coronary events<br><br>Coronary deaths | 5% of energy from SFA → total carbohydrate<br><br>5% of energy from SFA → total carbohydrate | ↑<br><br>↔ | HR 1.07 (1.01-1.14)<br><br>HR 0.96 (0.82-1.13) | Age; BMI; year survey completed; percentage of energy from MUFA, PUFA, trans fat, protein and carbohydrates; energy intake; smoking; physical activity; education; alcohol intake; fiber intake; cholesterol intake; hypertension |
| Jakobsen 2010 [11]                                    | Prospective cohort                            | 53,644                 | Median 12     | MI                                     | 5% of energy from SFA → total carbohydrates                                                  | ↔          | HR 1.04 (0.92-1.17)                            | Age, sex, BMI; percentage of energy from glycemic carbohydrates, proteins, MUFA, PUFA; energy intake; smoking; physical activity; education; alcohol consumer; intake of alcohol; hypertension                                    |
|                                                       |                                               |                        |               |                                        | 5% of energy from SFA → carbohydrates with low-GI (median GI 82)                             | ↔          | HR 0.88 (0.72-1.07)                            |                                                                                                                                                                                                                                   |
|                                                       |                                               |                        |               |                                        | 5% of energy from SFA → carbohydrates with medium-GI (median GI 88)                          | ↔          | HR 0.98 (0.80-1.21)                            |                                                                                                                                                                                                                                   |

|                                     |                    |         |                     |                            |                                                                                                   |            |                                                |                                                                                                                                                                                                                                                                                                                                                     |
|-------------------------------------|--------------------|---------|---------------------|----------------------------|---------------------------------------------------------------------------------------------------|------------|------------------------------------------------|-----------------------------------------------------------------------------------------------------------------------------------------------------------------------------------------------------------------------------------------------------------------------------------------------------------------------------------------------------|
|                                     |                    |         |                     |                            | 5% of energy from SFA → carbohydrates with high-GI (median GI 93)                                 | ↑          | HR 1.33 (1.08-1.64)                            |                                                                                                                                                                                                                                                                                                                                                     |
| Guasch-Ferré 2015 [2]<br>[PREDIMED] | Prospective cohort | 7,038   | 6                   | CVD<br><br>All-cause death | 5% of energy from SFA → total carbohydrate                                                        | ↔<br><br>↔ | HR 0.83 (0.63-1.10)<br><br>HR 1.04 (0.81-1.33) | Age; sex; BMI; intake of subtypes of fat, protein, and carbohydrates; energy intake; smoking; physical activity; education; alcohol intake; fiber intake; cholesterol intake; hypertension; intervention group; diabetes; hyper-cholesterolemia; family history of CHD; antihypertensive medication; oral antidiabetic agents; lipid lowering drugs |
| Li 2015 [3]<br>[NHS; HPFS]          | Prospective cohort | 127,536 | Range 24-30         | CHD                        | 5% of energy from SFA → whole grains<br><br>5% of energy from SFA → refined starches/ added sugar | ↓<br><br>↔ | HR 0.91 (0.85-0.98)<br><br>Not reported        | BMI, percentage of energy from protein; energy intake; smoking; physical activity; alcohol intake; cholesterol intake; hypertension at baseline; hypercholesterolemia at baseline; family history of myocardial infarction and diabetes; use of vitamins and aspirin                                                                                |
| Zong 2016 [6]<br>[NHS; HPFS]        | Prospective cohort | 115,782 | NHS 25.8; HPFS 21.2 | CHD                        | 1% of energy from 12:0-18:0 SFA → whole grains                                                    | ↓          | HR 0.94 (0.91, 0.97)                           | Age; BMI; ethnicity; total energy; energy from trans fat; energy from carbohydrates of non-whole grain sources; energy from non-plant sources; smoking status; physical activity; alcohol intake; family history of MI; menopausal status; postmenopausal hormone use; aspirin                                                                      |

|                                       |                    |         |                                     |        |                                                                                |   |                      |                                                                                                                                                                                                                                                                                               |
|---------------------------------------|--------------------|---------|-------------------------------------|--------|--------------------------------------------------------------------------------|---|----------------------|-----------------------------------------------------------------------------------------------------------------------------------------------------------------------------------------------------------------------------------------------------------------------------------------------|
|                                       |                    |         |                                     |        |                                                                                |   |                      | use; multivitamin use; baseline hypertension; baseline hypercholesterolemia; MUFA intake; PUFA intake; plant protein intake; intake of other SFA                                                                                                                                              |
| Chen 2016 [10]<br>[NHS; NHS II; HPFS] | Prospective cohort | 134,327 | NHS ≤ 32;<br>NHS II ≤ 20; HPFS ≤ 24 | CVD    | 5% of energy from dairy fat → carbohydrate from whole grains                   | ↓ | HR 0.72 (0.69-0.75)  | Age, BMI, intake of protein; energy intake; smoking; physical activity; intake of fruit, vegetables, coffee; alcohol intake; baseline hypertension; baseline hyper-cholesterolemia; race; menopausal status and menopausal hormone use (NHS and NHS II); oral contraceptive use (NHS II only) |
|                                       |                    |         |                                     | CHD    |                                                                                | ↓ | HR 0.66 (0.62-0.70)  |                                                                                                                                                                                                                                                                                               |
|                                       |                    |         |                                     | Stroke |                                                                                | ↓ | HR 0.84 (0.78-0.91)  |                                                                                                                                                                                                                                                                                               |
|                                       |                    |         |                                     | CVD    | 5% of energy from dairy fat → carbohydrate from refined starch and added sugar | ↔ | HR 0.97 (0.94-1.00)  |                                                                                                                                                                                                                                                                                               |
|                                       |                    |         |                                     | CHD    |                                                                                | ↔ | HR 0.96 (0.93-1.00)  |                                                                                                                                                                                                                                                                                               |
|                                       |                    |         |                                     | Stroke |                                                                                | ↔ | HR 0.98 (0.94-1.03)  |                                                                                                                                                                                                                                                                                               |
| Praagman 2016 [EPIC-NL] [4]           | Prospective cohort | 35,597  | 12                                  | IHD    | 5% of energy from SFA → total carbohydrates                                    | ↑ | HR (1.23 (1.09-1.40) | Age, sex, BMI, waist circumference; intake of carbohydrate, cis-MUFA, PUFA, trans fat, animal protein and vegetable (per 5% of energy); energy intake (excluding alcohol); smoking, physical activity; education; alcohol intake; fiber intake (energy adjusted);                             |
|                                       |                    |         |                                     |        | 5% of energy from SFA → carbohydrates                                          | ↔ | HR 1.14 (0.91-1.43)  |                                                                                                                                                                                                                                                                                               |

|                                                  |                                               |                        |             |            |                                                            |   |                        |                                                                                                                                                                                                                                                                  |
|--------------------------------------------------|-----------------------------------------------|------------------------|-------------|------------|------------------------------------------------------------|---|------------------------|------------------------------------------------------------------------------------------------------------------------------------------------------------------------------------------------------------------------------------------------------------------|
|                                                  |                                               |                        |             |            | with low GI (GI <53)                                       |   |                        | cholesterol intake (energy adjusted);<br>vitamin c (energy adjusted)                                                                                                                                                                                             |
|                                                  |                                               |                        |             |            | 5% of energy from SFA → carbohydrates with medium GI       | ↑ | HR 1.35 (1.05-1.73)    |                                                                                                                                                                                                                                                                  |
|                                                  |                                               |                        |             |            | 5% of energy from SFA → carbohydrates with high GI (GI>56) | ↑ | HR 1.27 (1.03-1.56)    |                                                                                                                                                                                                                                                                  |
| Hooper 2015 [7]<br><br>Cochrane review           | Meta-analysis of randomized controlled trials | 15 studies (n >59,000) | >2          | CVD events | SFA → carbohydrate                                         | ↔ | RR 0.93 (0.79-1.08)    | Aggregate meta-analysis –no overall adjustment                                                                                                                                                                                                                   |
| <b>Substitution of saturated fat for protein</b> |                                               |                        |             |            |                                                            |   |                        |                                                                                                                                                                                                                                                                  |
| Larsson 2012 [12]                                | Prospective cohort                            | 34,670                 | Median 10.4 | Stroke     | 5% of energy from SFA → protein                            | ↓ | 13% lower risk (0-26%) | Age, BMI; intake of fat; energy intake; smoking status and smoking pack years; physical activity; education; alcohol intake; intake of cholesterol, calcium, fruits and vegetables; hypertension; diabetes; aspirin use; family history of myocardial infarction |
| Praagman 2016 [4]<br><br>[EPIC- NL]              | Prospective cohort                            | 35,597                 | 12          | IHD        | 5% of energy from SFA → total protein                      | ↑ | HR 1.29 (1.08-1.54)    | Age, sex, BMI, waist circumference; intake of carbohydrate, cis-MUFA, PUFA, trans fat, animal protein and vegetable (per 5% of energy); energy intake (excluding alcohol); smoking, physical activity; education; alcohol                                        |
|                                                  |                                               |                        |             |            | 5% of energy from SFA → animal protein                     | ↑ | HR 1.37 (1.14-1.65)    |                                                                                                                                                                                                                                                                  |

|                                    |                                               |                        |                     |            |                                                 |   |                      |                                                                                                                                                                                                                                                                                                                                                                                                                  |
|------------------------------------|-----------------------------------------------|------------------------|---------------------|------------|-------------------------------------------------|---|----------------------|------------------------------------------------------------------------------------------------------------------------------------------------------------------------------------------------------------------------------------------------------------------------------------------------------------------------------------------------------------------------------------------------------------------|
|                                    |                                               |                        |                     |            | 5% of energy from SFA → vegetable protein       | ↔ | HR 0.81 (0.57-1.17)  | intake; fiber intake (energy adjusted); cholesterol intake (energy adjusted); vitamin c (energy adjusted)                                                                                                                                                                                                                                                                                                        |
| Zong 2016 [6]<br>[NHS; HPFS]       | Prospective cohort                            | 115,782                | NHS 25.8; HPFS 21.2 | CHD        | 1% of energy from 12:0-18:0 SFA → plant protein | ↓ | HR 0.93 (0.89, 0.97) | Age; BMI; ethnicity; total energy; energy from trans fat; energy from carbohydrates of non-whole grain sources; energy from non-plant sources; smoking status; physical activity; alcohol intake; family history of MI; menopausal status; postmenopausal hormone use; aspirin use; multivitamin use; baseline hypertension; baseline hypercholesterolemia; MUFA intake; whole grain intake; intake of other SFA |
| Hooper 2015 [7]<br>Cochrane review | Meta-analysis of randomized controlled trials | 15 studies (n >59,000) | >2                  | CVD events | SFA → protein                                   | ↔ | RR 0.98 (0.90-1.06)  | Aggregate meta-analysis –no overall adjustment                                                                                                                                                                                                                                                                                                                                                                   |

## References

1. Jakobsen, M.U.; O'Reilly, E.J.; Heitmann, B.L.; Pereira, M.A.; Balter, K.; Fraser, G.E.; Goldbourt, U.; Hallmans, G.; Knekt, P.; Liu, S., *et al.* Major types of dietary fat and risk of coronary heart disease: a pooled analysis of 11 cohort studies. *Am J Clin Nutr* **2009**, *89*, 1425-1432.
2. Guasch-Ferré, M.; Babio, N.; Martínez-González, M.A.; Corella, D.; Ros, E.; Martín-Peláez, S.; Estruch, R.; Arós, F.; Gómez-Gracia, E.; Fiol, M., *et al.* Dietary fat intake and risk of cardiovascular disease and all-cause mortality in a population at high risk of cardiovascular disease. *Am J Clin Nutr* **2015**, *102*, 1563-1573.
3. Li, Y.; Hruby, A.; Bernstein, A.M.; Ley, S.H.; Wang, D.D.; Chiuve, S.E.; Sampson, L.; Rexrode, K.M.; Rimm, E.B.; Willett, W.C., *et al.* Saturated Fats Compared With Unsaturated Fats and Sources of Carbohydrates in Relation to Risk of Coronary Heart Disease: A Prospective Cohort Study. *J Am Coll Cardiol* **2015**, *66*, 1538-1548.

4. Praagman, J.; Beulens, J.W.; Alsema, M.; Zock, P.L.; Wanders, A.J.; Sluijs, I.; van der Schouw, Y.T. The association between dietary saturated fatty acids and ischemic heart disease depends on the type and source of fatty acid in the European Prospective Investigation into Cancer and Nutrition–Netherlands cohort. *Am J Clin Nutr* **2016**, *103*, 356-365.
5. Wang, D.D.; Li, Y.; Chiuve, S.E.; Stampfer, M.J.; Manson, J.E.; Rimm, E.B.; Willett, W.C.; Hu, F.B. Association of specific dietary fats with total and cause-specific mortality. *JAMA Intern Med* **2016**, *176*, 1134-1145.
6. Zong, G.; Li, Y.; Wanders, A.J.; Alsema, M.; Zock, P.L.; Willett, W.C.; Hu, F.B.; Sun, Q. Intake of individual saturated fatty acids and risk of coronary heart disease in US men and women: two prospective longitudinal cohort studies. *BMJ* **2016**, *355*, i5796.
7. Hooper, L.; Martin, N.; Abdelhamid, A.; Davey Smith, G. Reduction in saturated fat intake for cardiovascular disease. *Cochrane Database Syst Rev* **2015**, CD011737.
8. Mozaffarian, D.; Micha, R.; Wallace, S. Effects on Coronary Heart Disease of Increasing Polyunsaturated Fat in Place of Saturated Fat: A Systematic Review and Meta-Analysis of Randomized Controlled Trials. *PLoS Medicine* **2010**, *7*, e1000252.
9. Farvid, M.S.; Ding, M.; Pan, A.; Sun, Q.; Chiuve, S.E.; Steffen, L.M.; Willett, W.C.; Hu, F.B. Dietary Linoleic Acid and Risk of Coronary Heart Disease: A Systematic Review and Meta-Analysis of Prospective Cohort Studies. *Circulation* **2014**, *130*, 1568-1578.
10. Chen, M.; Li, Y.; Sun, Q.; Pan, A.; Manson, J.E.; Rexrode, K.M.; Willett, W.C.; Rimm, E.B.; Hu, F.B. Dairy fat and risk of cardiovascular disease in 3 cohorts of US adults. *Am J Clin Nutr* **2016**, *104*, 1209-1217.
11. Jakobsen, M.U.; Dethlefsen, C.; Joensen, A.M.; Stegger, J.; Tjønneland, A.; Schmidt, E.B.; Overvad, K. Intake of carbohydrates compared with intake of saturated fatty acids and risk of myocardial infarction: importance of the glycemic index. *Am J Clin Nutr* **2010**, *91*, 1764-1768.
12. Larsson, S.C.; Virtamo, J.; Wolk, A. Dietary fats and dietary cholesterol and risk of stroke in women. *Atherosclerosis* **2012**, *221*, 282-286.
