# Supplementary material for: Saturated Fatty Acids and Cardiovascular Disease: Replacements for Saturated Fat to Reduce Cardiovascular Risk
Source: Preprints.org preprint supplement (doi:10.20944/preprints201705.0135.v1), 2017-05-18
Supplement: Supplementary file 2 [file Table%202%20final%20pdf.pdf]

**Table 2: The effect of macronutrient substitutions of blood lipid levels as reported by Mensink 2016 [1]**

| Study                                  | Design                                                              | n          | Follow-up time   | Outcome           | Substitution                     | Result                                    | Effect size | Covariates included in analyses |
|----------------------------------------|---------------------------------------------------------------------|------------|------------------|-------------------|----------------------------------|-------------------------------------------|-------------|---------------------------------|
| Substitution of saturated fat for MUFA |                                                                     |            |                  |                   |                                  |                                           |             |                                 |
| Mensink 2016 [1]                       | Systematic review and meta-analysis of randomized controlled trials | 74 studies | Range 13-91 days | Total cholesterol | 1% of energy from SFA → cis-MUFA | -0.046 mmol/L (-0.051 to -0.040; p<0.001) | ↓           | No adjustment                   |
|                                        |                                                                     | 69 studies |                  | LDL cholesterol   |                                  | -0.042 mmol/L (-0.047 to -0.037; p<0.001) | ↓           |                                 |
|                                        |                                                                     | 68 studies |                  | HDL cholesterol   |                                  | -0.002 mmol/L (-0.00 to 0.000; p=0.014))  | ↓           |                                 |
|                                        |                                                                     | 72 studies |                  | Triglycerides     |                                  | -0.004 mmol/L (-0.007 to -0.001; p=0.022) | ↓           |                                 |
| Substitution of saturated fat for PUFA |                                                                     |            |                  |                   |                                  |                                           |             |                                 |
| Mensink 2016 [1]                       | Systematic review and meta-analysis of randomized controlled trials | 74 studies | Range 13-91 days | Total cholesterol | 1% of energy from SFA → cis-PUFA | -0.064 mmol/L (-0.070 to -0.058; p<0.001) | ↓           | No adjustment                   |
|                                        |                                                                     | 69 studies |                  | LDL cholesterol   |                                  | -0.055 mmol/L (-0.061 to -0.050; p<0.001) | ↓           |                                 |
|                                        |                                                                     | 68 studies |                  | HDL cholesterol   |                                  | -0.005 mmol/L (-0.006 to -0.003; p<0.001) | ↓           |                                 |

|                                                       |                                                                     |            |                  |                   |                                       |                                           |   |               |
|-------------------------------------------------------|---------------------------------------------------------------------|------------|------------------|-------------------|---------------------------------------|-------------------------------------------|---|---------------|
|                                                       |                                                                     | 72 studies |                  | Triglycerides     |                                       | -0.010 mmol/L (-0.014 to -0.007; p<0.001) | ↓ |               |
| <b>Substitution of saturated fat for carbohydrate</b> |                                                                     |            |                  |                   |                                       |                                           |   |               |
| Mensink 2016 [1]                                      | Systematic review and meta-analysis of randomized controlled trials | 74 studies | Range 13-91 days | Total cholesterol | 1% of energy from SFA → carbohydrates | -0.041 mmol/L (-0.047 to -0.035; p<0.001) | ↓ | No adjustment |
|                                                       |                                                                     | 69 studies |                  | LDL cholesterol   |                                       | -0.033 mmol/L (-0.039 to -0.027; p<0.001) | ↓ |               |
|                                                       |                                                                     | 68 studies |                  | HDL cholesterol   |                                       | -0.010 mmol/L (-0.012 to -0.008; p<0.001) | ↓ |               |
|                                                       |                                                                     | 72 studies |                  | Triglycerides     |                                       | 0.011 mmol/L (0.007 to 0.014; p=0.842)    | ↔ |               |

## References

1. Mensink, R. *Effects of saturated fatty acids on serum lipids and lipoproteins: a systematic review and regression analysis*; World Health Organization: Geneva, 2016.
